# Supplementary material for: The Association between Endometriosis, Tubal Ligation, Hysterectomy and Epithelial Ovarian Cancer: Meta-Analyses
Source: MDPI journal article supplement (doi:10.3390/ijerph13111138), 2016-11-14
Supplement: s1 [file s1]

# Supplementary Materials: The Association between Endometriosis, Tubal Ligation, Hysterectomy and Epithelial Ovarian Cancer: Meta-Analyses

Chunpeng Wang, Zhenzhen Liang, Xin Liu, Qian Zhang and Shuang Li

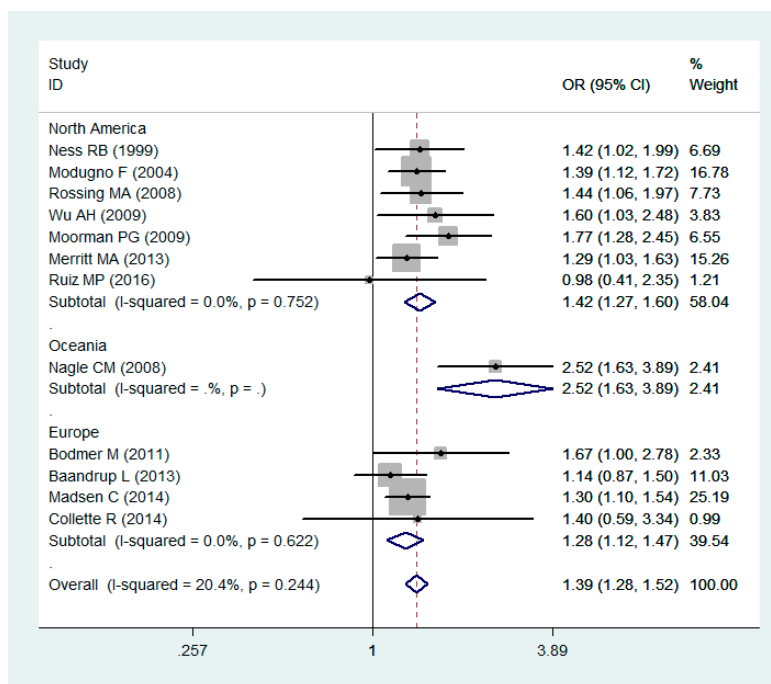

(A)

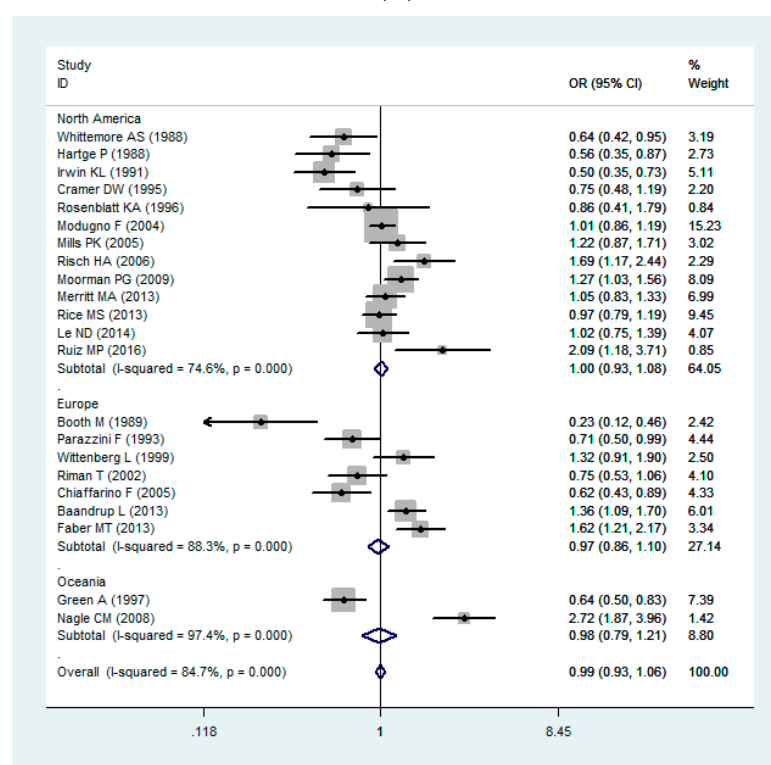

(B)

Figure S1. Cont.

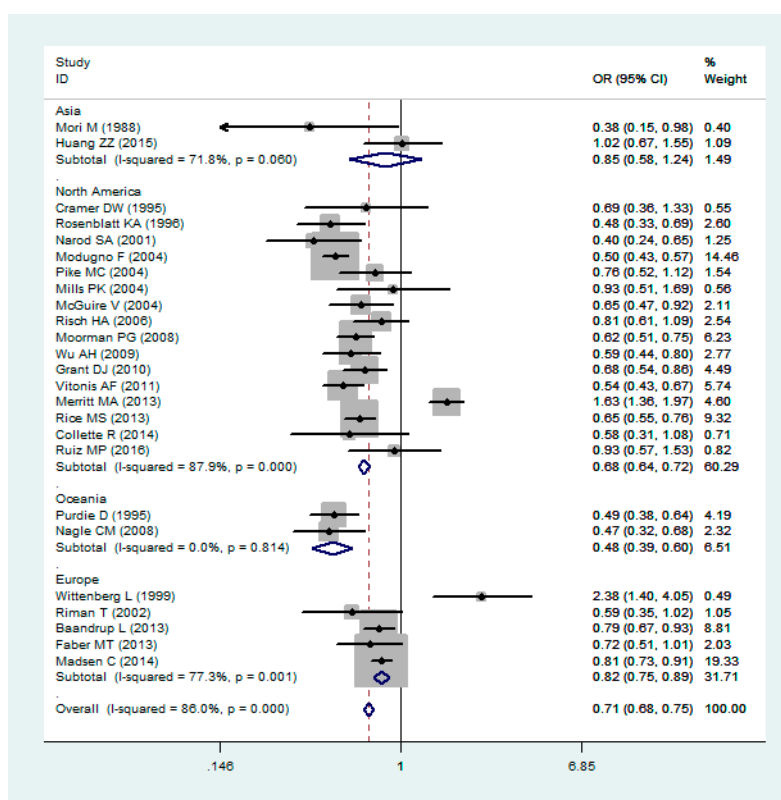

(C)

**Figure S1.** (A) The subgroup-analysis forest plot for the association between endometriosis and EOC; (B) The subgroup-analysis forest plot for the association between hysterectomy and EOC; (C) The subgroup-analysis forest plot for the association between tubal ligation and EOC.

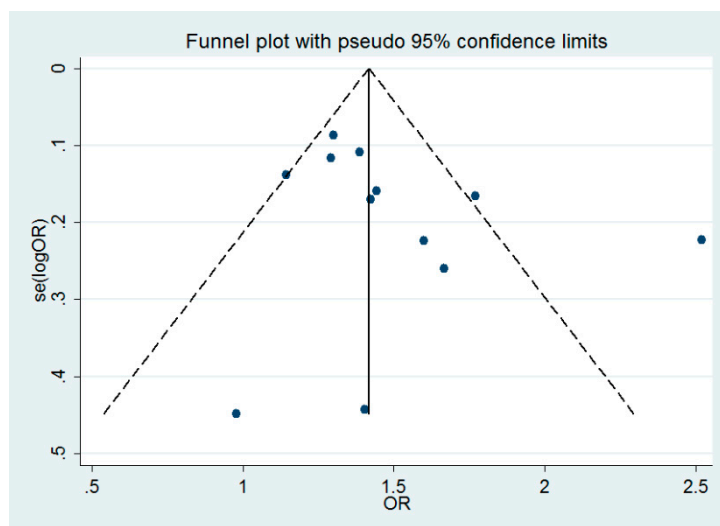

(A)

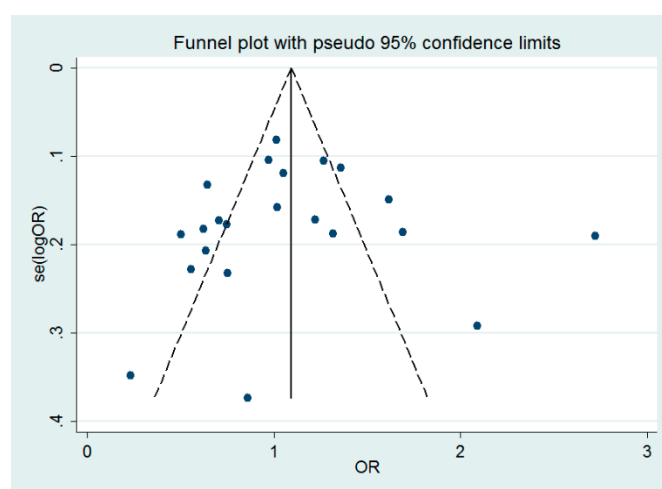

(B)

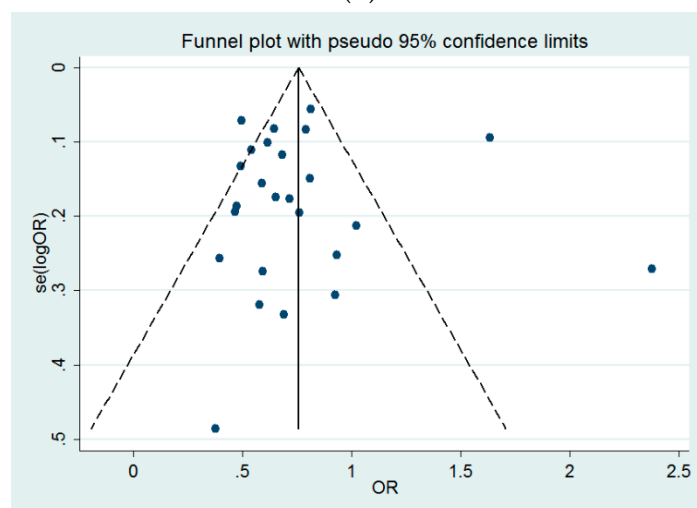

(C)

**Figure S2.** (A) The funnel plot for the association between endometriosis and EOC; (B) The funnel plot for the association between hysterectomy and EOC; (C) The funnel plot for the association between tubal ligation and EOC.

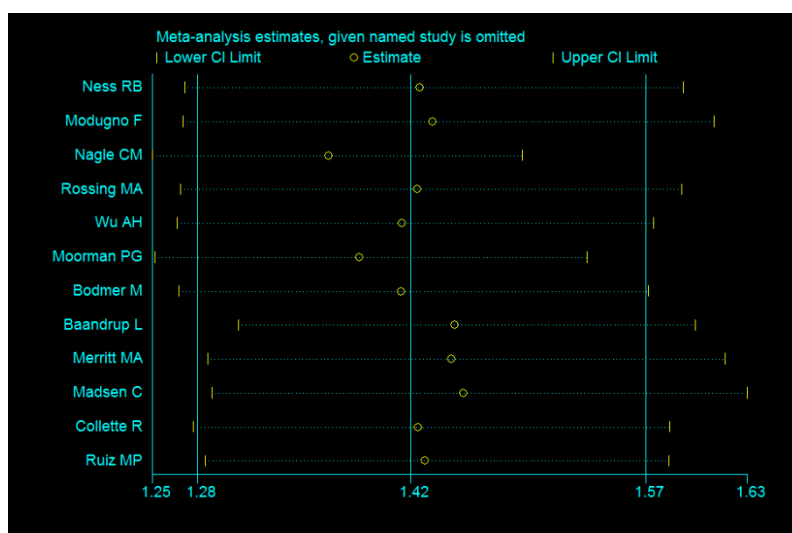

(A)

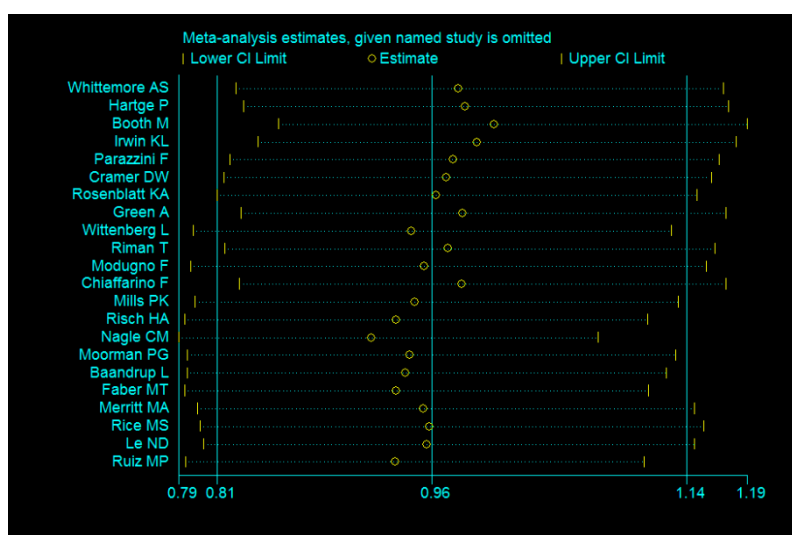

(B)

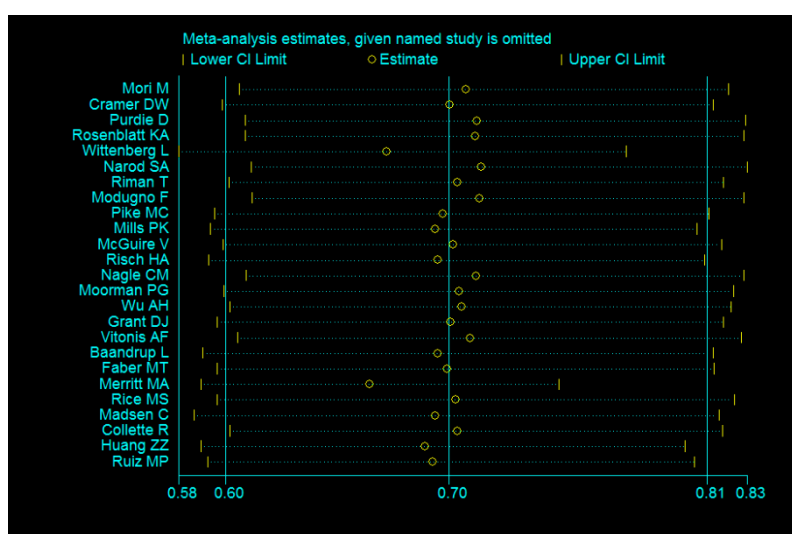

(C)

**Figure S3.** (A) The sensitivity analysis plot for the association between endometriosis and EOC; (B) The sensitivity analysis plot for the association between hysterectomy and EOC; (C) The sensitivity analysis plot for the association between tubal ligation and EOC.

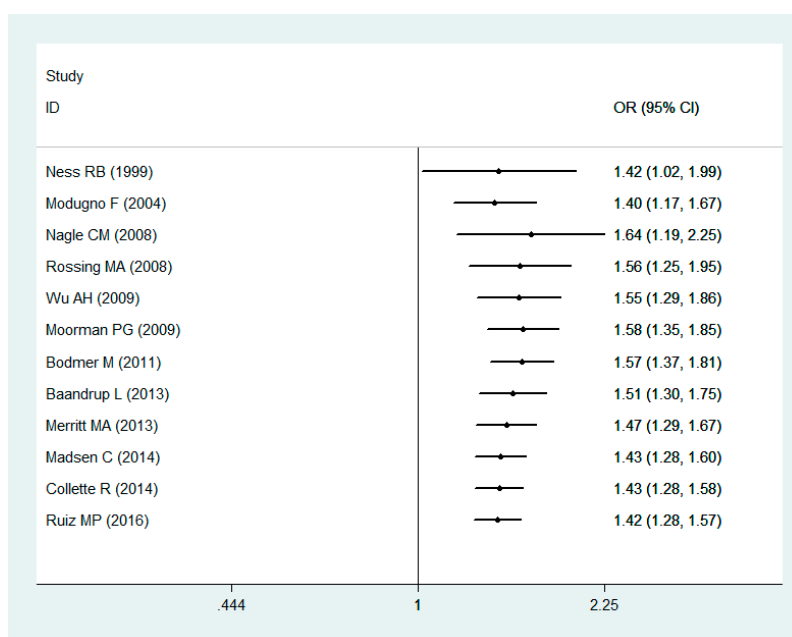

(A)

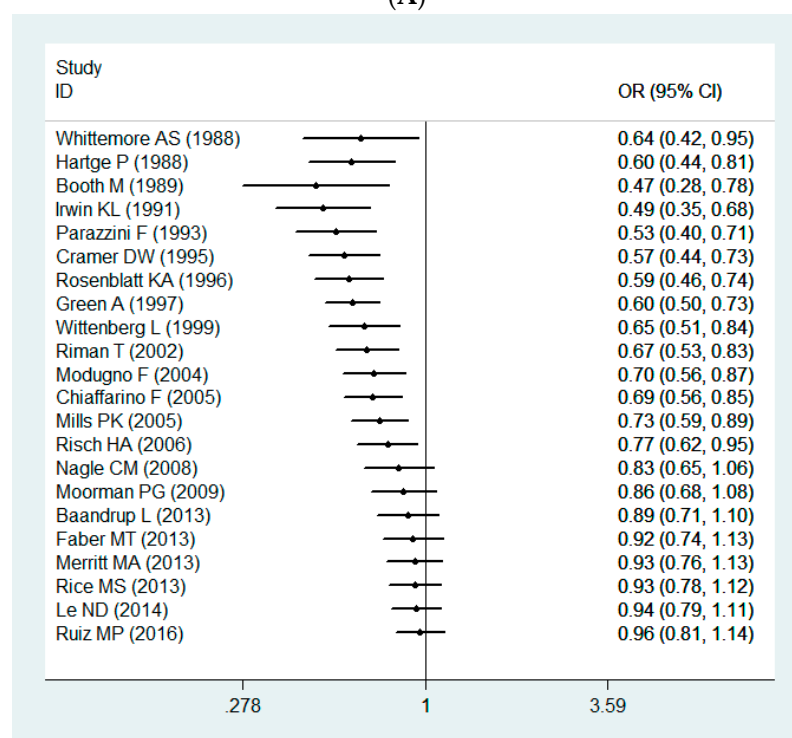

(B)

Figure S4. Cont.

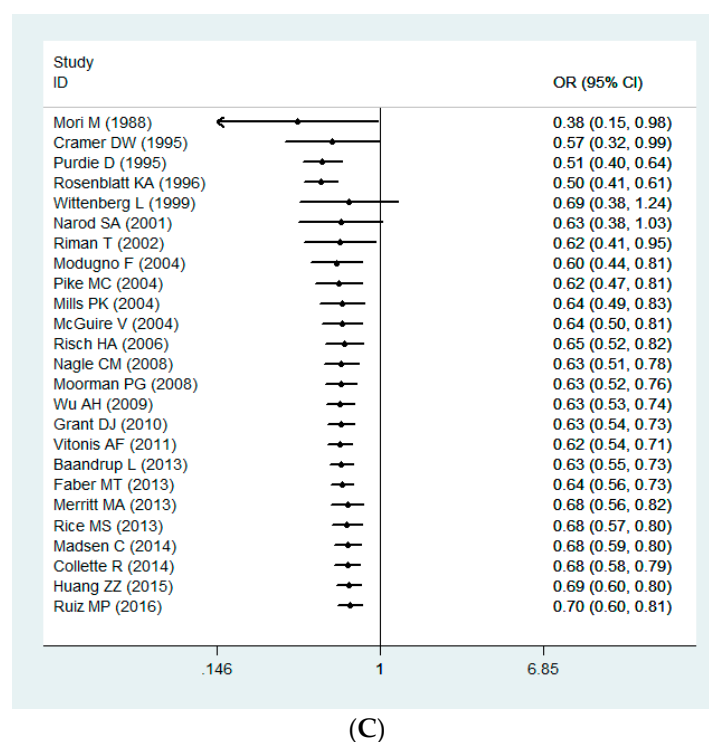

**Figure S4.** (A) The cumulative analysis plot for the association between endometriosis and EOC; (B) The cumulative analysis plot for the association between hysterectomy and EOC; (C) The cumulative analysis plot for the association between tubal ligation and EOC.

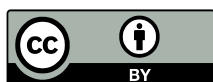

© 2016 by the authors; licensee MDPI, Basel, Switzerland. This article is an open access article distributed under the terms and conditions of the Creative Commons by Attribution (CC-BY) license (<http://creativecommons.org/licenses/by/4.0/>).
